# Supplementary material for: Investigating the Role of the Eurasian Badger (Meles meles) in the Nationwide Distribution of the Western European Hedgehog (Erinaceus europaeus) in England
Source: MDPI journal article supplement (doi:10.3390/ani9100759), 2019-10-09
Supplement: s1 [file s1]

# Investigating the Role of the Eurasian Badger (*Meles meles*) in the Nationwide Distribution of the Western European Hedgehog (*Erinaceus europaeus*) in England

Anouschka R. Hof, Andrew M. Allen <sup>4</sup> and Paul W. Bright

**Table S1.** Model analyses using mean values from landcover maps of 2007, showing coefficients and significance of all variables included within  $\Delta\text{BIC} < 4$  of the top model. The variables included in the top model are shown with an asterisk (\*). The independent contribution of each variable towards the explained variation ( $R^2$ ) was estimated using hierarchical partitioning, and the percent contribution towards the total explained variation ( $R^2 = 0.282$ ) is shown by I (%). VIF is the variance inflation factor and SE is the standard error.

| Variable                | Coefficient | SE    | <i>p</i> | $R^2$ | I (%) | VIF   |
|-------------------------|-------------|-------|----------|-------|-------|-------|
| Intercept               | 0.623       | 0.070 | <0.001   | -     | -     | -     |
| Badgers *               | -0.080      | 0.030 | 0.007    | 0.021 | 7.32  | 1.056 |
| Arable & horticulture * | 0.144       | 0.048 | 0.002    | 0.073 | 25.9  | 2.365 |
| Broadleaf woodland *    | -0.361      | 0.131 | 0.006    | 0.037 | 13.2  | 1.188 |
| Built-up *              | -0.474      | 0.088 | <0.001   | 0.054 | 19.5  | 3.251 |
| Improved grassland *    | -0.166      | 0.069 | 0.016    | 0.057 | 20.3  | 1.876 |
| Human Footprint *       | 0.368       | 0.089 | <0.001   | 0.024 | 8.5   | 3.559 |
| Semi-natural grassland  | 0.239       | 0.154 | 0.122    | 0.005 | 1.7   | 1.522 |
| Peaty soils             | -0.030      | 0.020 | 0.131    | 0.004 | 1.3   | 1.045 |
| Loamy soils             | 0.042       | 0.030 | 0.166    | 0.007 | 2.4   | 1.044 |

**Table S2.** Model analyses using median values from landcover maps of 2000, showing coefficients and significance of all variables included within  $\Delta\text{BIC} < 4$  of the top model. The variables included in the top model are shown with an asterisk (\*). The independent contribution of each variable towards the explained variation ( $R^2$ ) was estimated using hierarchical partitioning, and the percent contribution towards the total explained variation ( $R^2 = 0.265$ ) is shown by I (%). VIF is the variance inflation factor and SE is the standard error.

| Variable              | Coefficient | SE    | <i>p</i> | $R^2$ | I (%) | VIF   |
|-----------------------|-------------|-------|----------|-------|-------|-------|
| Intercept             | 0.649       | 0.053 | <0.001   | -     | -     | -     |
| Badgers *             | -0.077      | 0.030 | 0.012    | 0.019 | 7.47  | 1.070 |
| Arable horticulture * | 0.164       | 0.042 | <0.001   | 0.073 | 27.7  | 2.168 |
| Broadleaf woodland *  | -0.405      | 0.136 | 0.003    | 0.038 | 14.2  | 1.162 |
| Built-up *            | -0.373      | 0.071 | <0.001   | 0.056 | 21.2  | 2.187 |
| Improved grassland    | -0.100      | 0.062 | 0.108    | 0.042 | 15.7  | 1.982 |
| Human Footprint *     | 0.235       | 0.067 | <0.001   | 0.015 | 6.0   | 2.529 |
| Coniferous woodland   | 0.715       | 0.455 | 0.117    | 0.002 | 0.9   | 1.123 |
| Neutral grassland *   | 0.657       | 0.234 | 0.005    | 0.010 | 4.0   | 1.235 |
| Loamy soils           | 0.047       | 0.031 | 0.123    | 0.007 | 2.7   | 1.041 |

**Table S3.** Model analyses using mean values from landcover maps of 2000, showing coefficients and significance of all variables included within  $\Delta\text{BIC} < 4$  of the top model. The variables included in the top model are shown with an asterisk (\*). The independent contribution of each variable towards the explained variation ( $R^2$ ) was estimated using hierarchical partitioning, and the percent contribution towards the total explained variation ( $R^2 = 0.274$ ) is shown by I (%). VIF is the variance inflation factor and SE is the standard error.

| <b>Variable</b>       | <b>Coefficient</b> | <b>SE</b> | <b><i>p</i></b> | <b><math>R^2</math></b> | <b>I (%)</b> | <b>VIF</b> |
|-----------------------|--------------------|-----------|-----------------|-------------------------|--------------|------------|
| Intercept             | 0.499              | 0.045     | <0.001          | -                       | -            | -          |
| Badgers *             | -0.085             | 0.029     | 0.004           | 0.023                   | 8.5          | 1.036      |
| Arable horticulture * | 0.235              | 0.041     | <0.001          | 0.096                   | 35.1         | 1.585      |
| Broadleaf woodland    | -0.283             | 0.134     | 0.034           | 0.039                   | 14.3         | 1.160      |
| Built-up *            | -0.520             | 0.091     | <0.001          | 0.056                   | 20.3         | 3.267      |
| Human Footprint *     | 0.462              | 0.081     | <0.001          | 0.036                   | 13.1         | 2.973      |
| Neutral grassland *   | 0.705              | 0.182     | <0.001          | 0.015                   | 5.4          | 1.288      |
| Loamy soils           | 0.053              | 0.030     | 0.080           | 0.008                   | 3.1          | 1.024      |
